# Supplementary material for: An α2,3‐Sialyltransferase from Photobacterium phosphoreum with Broad Substrate Scope: Controlling Hydrolytic Activity by Directed Evolution
Source: PubMed Central journal article supplement — Chemistry. 2020 Aug 7;26(50):11614–24. doi: 10.1002/chem.202002277 (PMC7540698; doi:10.1002/chem.202002277), 2020-08-07

# Chemistry–A European Journal

Supporting Information

## **An $\alpha$ 2,3-Sialyltransferase from *Photobacterium phosphoreum* with Broad Substrate Scope: Controlling Hydrolytic Activity by Directed Evolution**

Alexander Mertsch, Ning He, Dong Yi, Michael Kickstein, and Wolf-Dieter Fessner<sup>\*[a]</sup>

# Supporting Information

| Index                                                                                                                             | page |
|-----------------------------------------------------------------------------------------------------------------------------------|------|
| <b>Cloning, expression, and purification of 2,3SiaT<sub>p<sub>pph</sub></sub></b>                                                 | 2    |
| Figure S1. Plasmid construction for expression of 2,3SiaT <sub>p<sub>pph</sub></sub>                                              | 2    |
| Figure S2. Cloning and expression of 2,3SiaT from <i>Photobacterium phosphoreum</i>                                               | 2    |
| Table S1: Primers for site directed mutagenesis library                                                                           | 3    |
| Table S2. Primers for second generation combination variants                                                                      | 4    |
| Table S3. Templates and primer mix combination for second generation combination library                                          | 4    |
| Table S4. Primers for preparation of specific individual combination variants                                                     | 4    |
| Table S5. Primer and template combination for specific individual combination variants                                            | 4    |
| Table S6. Analysis of distances between active site residues and substrates or water molecules                                    | 5    |
| Table S7. Thermodynamic stability of 2,3SiaT <sub>p<sub>pph</sub></sub> determined by nanoDSF                                     | 5    |
| <b>HPTLC screening</b>                                                                                                            | 6    |
| Figure S3. Elution by <i>n</i> -propanol:H <sub>2</sub> O:NH <sub>3</sub> = 7:3:1 for unbiased integration of Neu5Ac              | 6    |
| Figure S4. Quantitative analysis of sample from Figure S3; inset shows integration of lane 2                                      | 6    |
| Figure S5. Elution by <i>n</i> -butanol:acetone:H <sub>2</sub> O:AcOH = 35:35:23:7 for unbiased integration of SiaLac             | 7    |
| Figure S6. Quantitative analysis for lane 1                                                                                       | 7    |
| Table S8. HPTLC analysis of sialyltransfer vs. hydrolysis using 2,3SiaT <sub>p<sub>pph</sub></sub> and variants (duplicate runs)  | 8    |
| <b>Control for CMP independent sialidase activity</b>                                                                             |      |
| Table S9. Data for Figure 4: Quantification of sialidase activity                                                                 | 9    |
| Figure S7. Control experiment for sialidase activity in the presence of alkaline phosphatase                                      | 9    |
| <b>General protocol for synthesis of fluorescence-labeled neo-sialoconjugates using native 2,3SiaT<sub>p<sub>pph</sub></sub></b>  | 10   |
| <b>Synthesis of <math>\alpha</math>2,3-SiaLac (GM3 trisaccharide, 14) by engineered 2,3SiaT<sub>p<sub>pph</sub></sub> (A151D)</b> | 17   |
| <b>Exemplary kinetic profiles for native enzyme and best variants</b>                                                             | 19   |
| <b>Quality control of second-generation combination library by sequencing</b>                                                     | 20   |

## Cloning, expression, and purification of 2,3SiaT<sub>p<sub>ph</sub></sub>

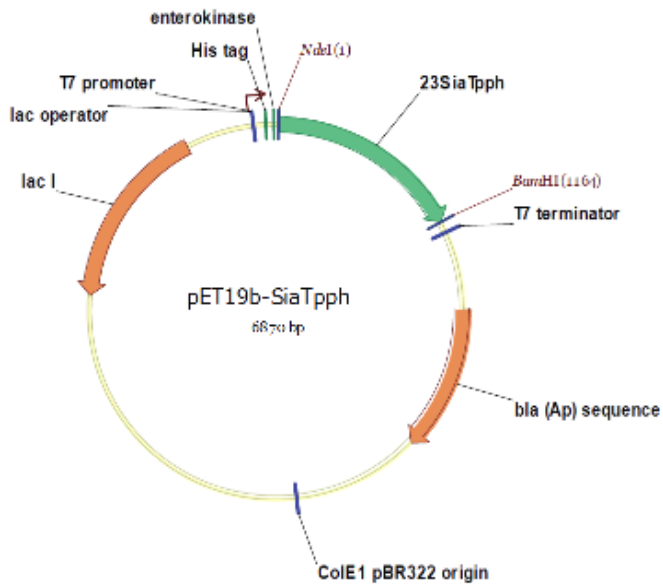

**Figure S1.** Plasmid construction for expression of 2,3SiaT<sub>p<sub>ph</sub></sub>.

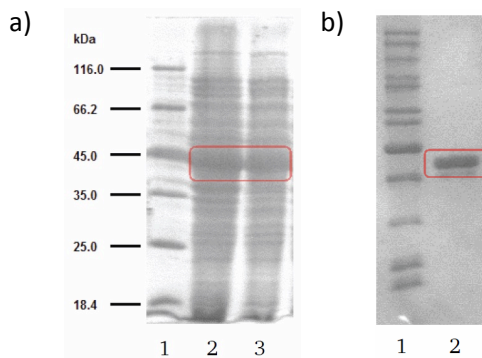

**Figure S2.** Cloning and expression of 2,3SiaT from *Photobacterium phosphoreum*. a) Expression level of the recombinant SiaT<sub>p<sub>ph</sub></sub> in BL21(DE3) analyzed by SDS-PAGE. Lanes 1: marker; 2: crude cell extract; 3: supernatant of crude cell extract. b) Purification of 2,3SiaT<sub>p<sub>ph</sub></sub> by Ni-affinity chromatography. Lanes 1: marker; 2: purified 2,3SiaT<sub>p<sub>ph</sub></sub>.

**Table S1.** Primers for site directed mutagenesis library (Agilent method)

|                                |                                                          |
|--------------------------------|----------------------------------------------------------|
| SiaT-L120NNK_F                 | AGTCATTATTAACGGCAATACGnnkTGGGCTGTCGACGTGGTAAAC           |
| SiaT-L120NNK_R                 | GTTTACCACGTCGACAGCCCAmnnCGTATTGCCGTTAATAATGACT           |
| SiaT-W121NNK_F                 | GTCATTATTAACGGCAATACGCTGnnkGCTGTCGACGTGGTAAACATTATC      |
| SiaT-W121NNK_R                 | GATAATGTTTACCACGTCGACAGCmnnCAGCGTATTGCCGTTAATAATGAC      |
| SiaT-D148NNK_F                 | AACCGAGATCGAACTGAACTTCTATGATnnkGGTAGCGCCGAGTAT           |
| SiaT-D148NNK_R                 | ATACTCGGCGTACCmnnATCATAGAAGTTCAGTTCGATCTCGGTT            |
| SiaT-S150WVC_F                 | CGAACTGAACTTCTATGATGATGGTwwcGCCGAGTATGTTC                |
| SiaT-S150WVC_R                 | GAACATACTCGGCGbwaCCATCATCATAGAAGTTCAGTTCG                |
| SiaT-A151NNK_F                 | CTGAACTTCTATGATGATGGTAGCnnkGAGTATGTTTCGCTGTATGATTTTC     |
| SiaT-A151NNK_R                 | GAAATCATAACAGGCGAACATACTCmnnGCTACCATCATCATAGAAGTTCAG     |
| SiaT-R155NNK_F                 | GATGATGGTAGCGCCGAGTATGTTnnkCTGTATGATTTCTCTCGC            |
| SiaT-R155NNK_R                 | GCGAGAGAAAATCATAACAGmnnAACATACTCGGCGTACCATCATC           |
| SiaT-N190NNK_F                 | CATCAACGGTACTCAGCCGTTTCGATnnkAGCATTGAAAAACATCTATGG       |
| SiaT-N190NNK_R                 | CCATAGATGTTTTCAATGCTmnnATCGAACGGCTGAGTACCGTTGATG         |
| SiaT-T278WVC_F, SiaT-N279WVC_F | CACGAAAACCTTCATCTTTCATTGGCwvcwvcTCTGGTACTGCCACTGCCGAGCAA |
| SiaT-T278WVC_R, SiaT-N279WVC_R | TTGCTCGGCAGTGGCAGTACCAGAGbwgbwgCCAATGAAGATGAAGTTTTTCGTG  |
| SiaT-H317NNK_F                 | TGGCACCAATTCTGGTACTGCnnkTGCCGAGCAACAAATCGATAT            |
| SiaT-H317NNK_R                 | ATATCGATTTGTTGCTCGGCmnnGCAGTACCAGAATTGGTGCCA             |
| SiaT-S359 WVC, S360WVC_F       | CAGATGCCGTGGGTGGTATGGGTwwcwvcCGTTTTCTTCTCACTGCCAAAGAC    |
| SiaT-S359 WVC, S360WVC_R       | GTGTTTGGCAGTGAGAAGAAAACGbwgbwgACCATACCACCCACGGCATCTG     |
| SiaT-L364NNK_F                 | ACCGACATTTGAGAATAACGCCnnkATCCAGGTCATGATTGAGCTG           |
| SiaT-L364NNK_R                 | CAGCTCAATCATGACCTGGATmnnGGCGTTATTCTCAATGTCGGT            |



**Table S2.** Primers for second generation combination variants (NEB method)

|                              |                             |
|------------------------------|-----------------------------|
| 1) SiaT-150S/T, SiaT151L/M_F | ascmtgGAGTATGTTTCGCCCTGTATG |
| 2) SiaT-D148S/L_R            | accraATCATAGAAGTTCAGTTCCG   |
| 3) SiaT-S150S/T, A151_F      | ascgccGAGTATGTTTCGCCCTGTATG |
| 4) D148_R                    | accatcATCATAGAAGTTCAGTTCCG  |

Primer mix: A = 1+2, B = 1+4, C = 2+3, D = 3+4

**Table S3.** Templates and primer mix combination for second generation combination library

|              |                       |     |     |     |                       |     |     |     |
|--------------|-----------------------|-----|-----|-----|-----------------------|-----|-----|-----|
| Primer mix → | A                     | B   | C   | D   | A                     | B   | C   | D   |
| Position ↓   | template: native gene |     |     |     | template: S359T/S360T |     |     |     |
| D148         | L/S                   | D   | L/S | D   | L/S                   | D   | L/S | D   |
| S150         | S/T                   | S/T | S/T | S/T | S/T                   | S/T | S/T | S/T |
| A151         | L/M                   | L/M | A   | A   | L/M                   | L/M | A   | A   |

**Table S4.** Primers for preparation of specific individual combination variants (NEB method)

|              |                               |
|--------------|-------------------------------|
| SiaT-A151D_F | TGATGGTAGCgatGAGTATGTTCCG     |
| SiaT-A151D_R | TCATAGAAGTTCAGTTCCGATCTCCG    |
| SiaT-E342A_F | AATCCCGTTCgcgGCCCTGATTATG     |
| SiaT-E342A_R | TTGTTATAAAATCTCGATCATGTTATG   |
| SiaT-S359T_F | TGGTATGGGTaccAGCGTTTTCTTCTCAC |
| SiaT-S359T_R | CCCACGGCATCTGGCAGAG           |
| SiaT-L387A_F | GAATAACGCCgcgATCCAGG          |
| SiaT-L387A_R | TCAATGTCGGTGTTCGCTTTTATAG     |

**Table S5.** Primer and template combination for specific individual combination variants

| template          | primer         | product                 |
|-------------------|----------------|-------------------------|
| w.t.              | SiaT-E342A_F/R | E342A                   |
| A151D             | SiaT-E342A_F/R | A151D/E342A             |
| A151D             | SiaT-L387A_F/R | A151D/L387A             |
| S359T/S360T       | SiaT-A151D_F/R | A151D/S359T/S360T       |
| A151D/S359T/S360T | SiaT-L387A_F/R | A151D/S359T/S360T/L387A |

**Table S6.** Analysis of distances between 13 selected amino acid residues and substrates or water molecules in the active site, and distances between water molecules and the centers of nucleophile attack during transfer or potential hydrolysis (sialoside C2 and phosphate, respectively).

| AA position / Codon type                                     | Contact distances [Å] <sup>[a]</sup> |                         |                         |                   |                  |               |  |
|--------------------------------------------------------------|--------------------------------------|-------------------------|-------------------------|-------------------|------------------|---------------|--|
| L120 / NNK                                                   | <u>CD2</u> , GalO2: 4.7              | <u>CD2</u> , GalO3: 5.0 | <u>CD2</u> , GalO4: 4.1 |                   |                  |               |  |
| W121 / NNK                                                   | NE1, GalO4: 3.4                      | NE1, GalO5: 3.7         | NE1, GalO6: 3.6         |                   |                  |               |  |
| D148 / NNK                                                   | OD2, GalO3: 2.1                      | OD2, GalO4: 2.4         | OD2, SiaO4: 3.4         | OD2, wat4: 4.5    |                  |               |  |
|                                                              | OD1, GalO3: 3.7                      | OD1, GalO4: 1.9         | O, SiaO4: 4.0           | O, wat4: 2.7      |                  |               |  |
| S150 / WVC                                                   | OG, SiaO1: 4.8                       | OG, SiaO4: 3.5          | OG, PO2: 4.2            | OG, wat1: 2.8     | OG, wat2: 4.6    |               |  |
|                                                              | N, SiaO1: 4.3                        | N, SiaO4: 2.1           | OG, SiaN5: 1.7          |                   |                  |               |  |
| A151 / NNK                                                   | N, SiaO10: 3.9                       | N, SiaN5: 3.0           | N, SiaN5: 3.0           |                   | CB, GalO3: 4.3   |               |  |
| R155 / NNK                                                   | NH2, GalO1: 6.5                      | NE, GalO2: 7.8          | NE, SiaO10: 7.3         | NH2, GluO1: 5.1   |                  |               |  |
| N190 / NNK                                                   | ND2, GalO1: 7.2                      | ND2, GalO2: 9.1         | ND2, GluO1: 6.4         |                   |                  |               |  |
| T278 / WVC                                                   | OG1, wat3: 2.8                       | OG1, wat2: 6.1          | OG1, SiaO9: 4.7         | OG1, SiaO8: 5.5   |                  |               |  |
| N279 / WVC                                                   | N, SiaO9: 6.6                        | O, SiaO9: 7.0           | ND2, SiaO9: 5.8         | OD1, SiaO9: 5.5   |                  |               |  |
| H317 / NNK                                                   | NE2, PO3: 4.1                        | NE2, PO4: 6.3           | NE2, PA: 5.6            | NE2, SiaO8: 4.3   | NE2, SiaO9: 5.4  | N, CMPN4: 4.7 |  |
| S359 / WVC                                                   | OG, PO2: 3.5                         | OG, PO3: 3.7            | OG, PO4: 3.7            | OG, PO4: 3.9      | OG, wat3: 4.0    |               |  |
|                                                              |                                      |                         |                         |                   | N, wat3: 4.3     | N, wat2: 4.8  |  |
| S360 / WVC                                                   | N, PO2: 1.3                          | N, PO3: 3.7             | N, PA: 2.7              | N, PO4: 3.4       | N, wat1: 3.6     | N, wat2: 5.6  |  |
|                                                              | OG, PO2: 1.8                         | OG, PO3: 3.4            | OG, PA: 2.2             | OG, PO4: 3.2      | OG, wat1: 3.8    | OG, wat4: 5.3 |  |
|                                                              | OG, PO1: 1.8                         |                         |                         |                   |                  |               |  |
| L387 / NNK                                                   | CD2, wat1: 4.7                       | CD2, wat2: 4.0          |                         | CD1, SiaC11: 4.1  | CD2, SiaC11: 5.2 | CD2, PA: 8.7  |  |
| <b>Distances between water molecules and phosphate/SiaC2</b> |                                      |                         |                         |                   |                  |               |  |
|                                                              | PA, wat1: 4.4                        | PA, wat2: 6.4           | PA, wat3: 5.7           | PA, wat4: 6.2     |                  |               |  |
|                                                              | SiaC2A, wat1: 5.1                    | SiaC2A, wat2: 6.9       | SiaC2A, wat3: 7.2       | SiaC2A, wat4: 4.8 |                  |               |  |

[a] Based on the 3D alignment model, as determined by PyMOL analysis. Selections contain: CD2 (contact in AA), GalO2 (contact to substrate and water); C: contact atom underlined, CD2: PyMOL atom descriptor. For clarity, PyMOL descriptors were amended by prefix Sia for Neu5Ac moiety, Gal for galactosyl unit and Glu for glucose unit in lactose.

**Table S7.** Thermodynamic stability of 2,3SiaT<sub>pph</sub> determined by nanoDSF.

| enzyme variant | melting point $T_m$ [°C] |
|----------------|--------------------------|
| parent         | 47.1                     |
| A151D          | 45.4                     |
| L387A          | 44.8                     |
| S359T/S360T    | 48.0                     |

## HPTLC screening

Reaction samples were analyzed by high performance thin layer chromatography (HPTLC; CAMAG Automatic TLC Sampler 4) on Merck silica gel plates 60 F<sub>254</sub>. For each time point measurement two identical 10 µL-samples were sprayed and developed with different solvent mixtures to discriminate partially overlapping bands and quantify the amount of product ( $\alpha$ 2,3-SiaLac) and hydrolysis side product (Neu5Ac). The basic solvent mix consisted of *n*-propanol : H<sub>2</sub>O : NH<sub>3</sub>(20%) = 7 : 3 : 1, and acidic solvent mix of *n*-butanol : acetone : AcOH : H<sub>2</sub>O = 35 : 35 : 7 : 23. After anisaldehyde staining a quantitative analysis was performed (CAMAG TLC Scanner 4) against standards for SiaLac and Neu5Ac as positive controls, resulting in absolute concentrations of the substrates and products.

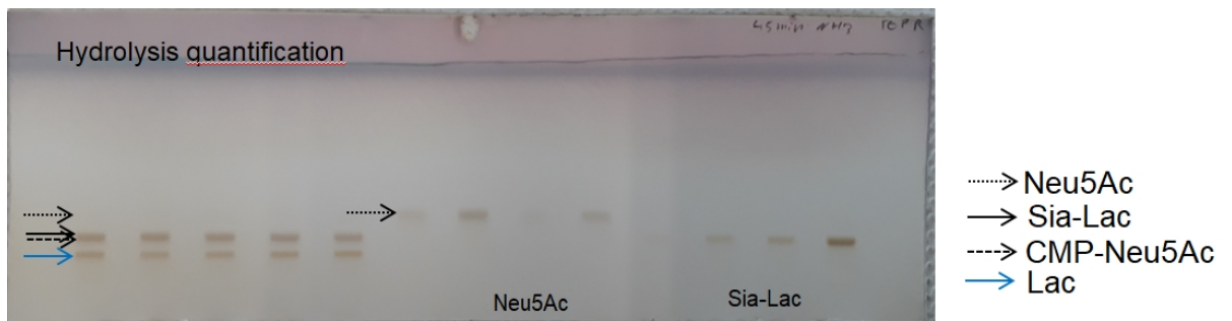

**Figure S3.** Elution by *n*-propanol:H<sub>2</sub>O:NH<sub>3</sub> = 7:3:1 for unbiased integration of Neu5Ac.

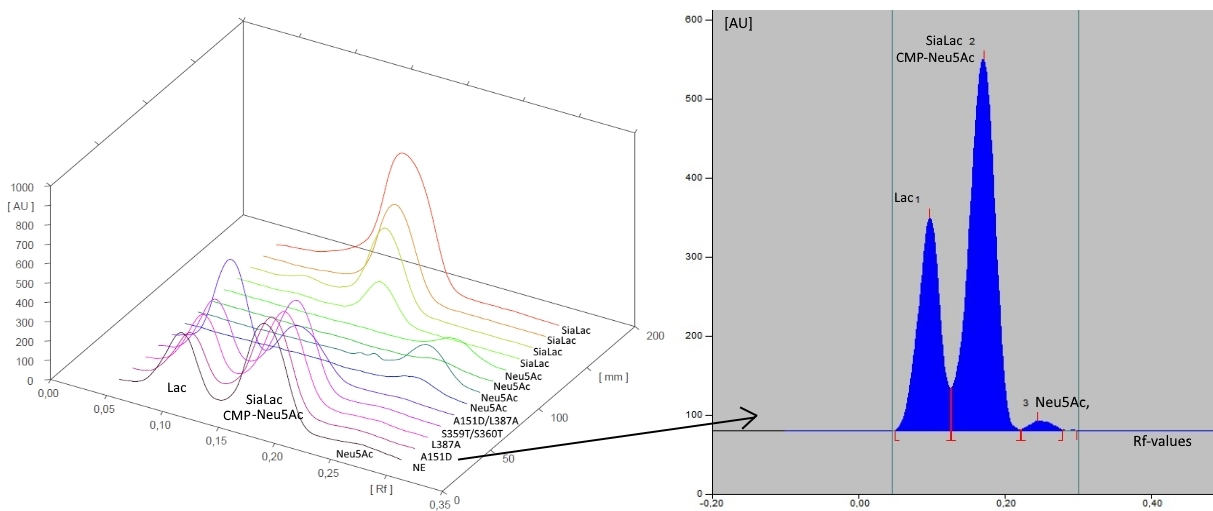

**Figure S4.** Quantitative analysis of sample from Figure S3; inset shows integration of lane 2.

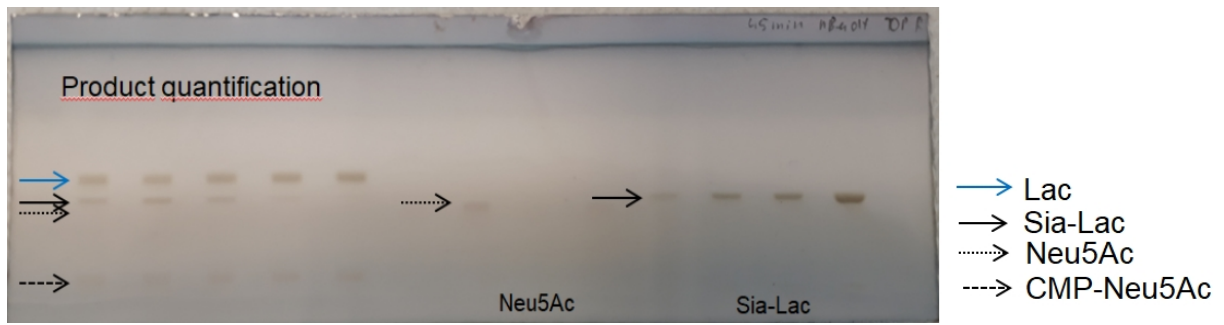

**Figure S5.** Elution by *n*-butanol:acetone:H<sub>2</sub>O:AcOH = 35:35:23:7 for unbiased integration of SiaLac.

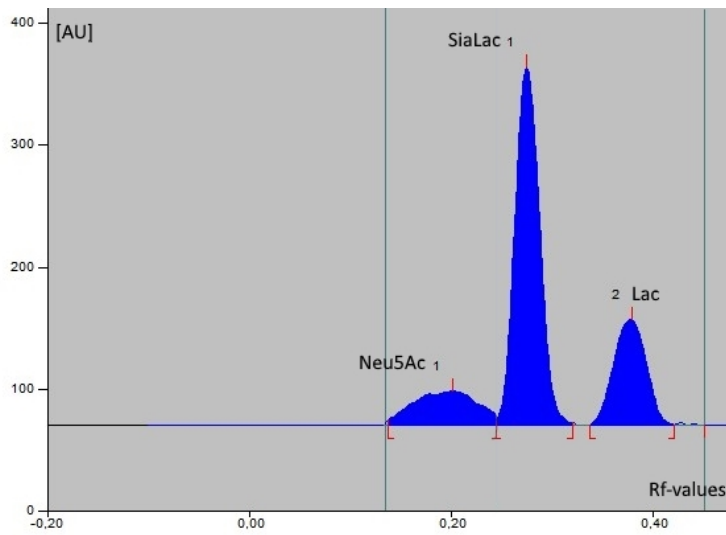

**Figure S6.** Quantitative analysis for lane 1.

**Table S8.** HPTLC analysis of sialyltransfer vs. hydrolysis using 2,3SiaT<sub>p</sub>ph (NE) and variants (duplicate runs).

| 1.      | NE        |              | C8 (A151D) |              | C7 (L387A) |              | G7 (S359T/S360T) |              | 2x (A151D/L387A) |              |
|---------|-----------|--------------|------------|--------------|------------|--------------|------------------|--------------|------------------|--------------|
|         | product % | hydrolysis % | product %  | hydrolysis % | product %  | hydrolysis % | product %        | hydrolysis % | product %        | hydrolysis % |
| 10,00   | 9,36      | 2,99         | 14,43      | 0,57         | 7,18       | 1,31         | 2,65             | 3,91         | 1,29             | 0,71         |
| 45,00   | 16,87     | 2,40         | 22,64      | 2,85         | 14,79      | 3,30         | 6,89             | 2,25         | 1,66             | 2,87         |
| 120,00  | 27,85     | 2,33         | 31,73      | 2,10         | 25,57      | 2,73         | 19,57            | 2,38         | 4,53             | 1,66         |
| 240,00  | 50,38     | 7,97         | 55,82      | 5,52         | 44,94      | 6,89         | 39,48            | 4,75         | 7,34             | 5,57         |
| 360,00  | 70,76     | 6,18         | 73,50      | 3,58         | 65,20      | 3,91         | 68,11            | 3,66         | 15,71            | 2,57         |
| 1320,00 | 89,29     | 10,71        | 93,03      | 6,97         | 88,11      | 8,56         | 91,41            | 8,59         | 29,68            | 14,57        |

| 2.      | NE        |              | C8 (A151D) |              | C7 (L387A) |              | G7 (S359T/S360T) |              | 2x (A151D/L387A) |              |
|---------|-----------|--------------|------------|--------------|------------|--------------|------------------|--------------|------------------|--------------|
|         | product % | hydrolysis % | product %  | hydrolysis % | product %  | hydrolysis % | product %        | hydrolysis % | product %        | hydrolysis % |
| 10,00   | 6,96      | 1,73         | 8,39       | 0,60         | 5,57       | 1,22         | 2,90             | 1,81         | 1,92             | 2,16         |
| 45,00   | 19,46     | 1,85         | 22,39      | 1,02         | 16,67      | 1,33         | 12,48            | 1,67         | 5,39             | 1,60         |
| 120,00  | 30,62     | 2,01         | 34,26      | 1,09         | 33,57      | 1,94         | 30,65            | 3,47         | 9,87             | 1,29         |
| 240,00  | 46,10     | 4,55         | 47,12      | 2,14         | 45,90      | 2,10         | 47,47            | 2,25         | 16,32            | 2,19         |
| 360,00  | 51,86     | 5,30         | 55,78      | 2,05         | 57,83      | 1,70         | 65,08            | 3,06         | 22,27            | 4,59         |
| 1320,00 | 89,08     | 10,92        | 93,95      | 6,05         | 91,27      | 6,49         | 93,71            | 9,76         | 39,73            | 11,26        |

| Average | NE        |              | C8 (A151D) |              | C7 (L387A) |              | G7 (S359T/S360T) |              | 2x (A151D/L387A) |              |
|---------|-----------|--------------|------------|--------------|------------|--------------|------------------|--------------|------------------|--------------|
|         | product % | hydrolysis % | product %  | hydrolysis % | product %  | hydrolysis % | product %        | hydrolysis % | product %        | hydrolysis % |
| 10,00   | 8,16      | 2,36         | 11,41      | 0,58         | 6,38       | 1,27         | 2,77             | 2,86         | 1,60             | 1,44         |
| 45,00   | 18,17     | 2,13         | 22,51      | 1,94         | 15,73      | 2,32         | 9,68             | 1,96         | 3,53             | 2,24         |
| 120,00  | 29,24     | 2,17         | 33,00      | 1,60         | 29,57      | 2,34         | 25,11            | 2,92         | 7,20             | 1,48         |
| 240,00  | 48,24     | 6,26         | 51,47      | 3,83         | 45,42      | 4,49         | 43,48            | 3,50         | 11,83            | 3,88         |
| 360,00  | 61,31     | 5,74         | 64,64      | 2,82         | 61,51      | 2,80         | 66,59            | 3,36         | 18,99            | 3,58         |
| 1320,00 | 89,19     | 10,81        | 93,49      | 6,51         | 89,69      | 7,53         | 92,56            | 9,18         | 34,70            | 12,92        |

| error | wt        |              | C8 (A151D) |              | C7 (L387A) |              | G7 (S359T/S360T) |              | 2x (A151D/L387A) |              |
|-------|-----------|--------------|------------|--------------|------------|--------------|------------------|--------------|------------------|--------------|
|       | product % | hydrolysis % | product %  | hydrolysis % | product %  | hydrolysis % | product %        | hydrolysis % | product %        | hydrolysis % |
| 10    | 1,20      | 0,63         | 3,02       | 0,02         | 0,81       | 0,04         | 0,12             | 1,05         | 0,32             | 0,72         |
| 45    | 1,29      | 0,27         | 0,13       | 0,91         | 0,94       | 0,98         | 2,80             | 0,29         | 1,86             | 0,64         |
| 120   | 1,39      | 0,16         | 1,26       | 0,51         | 4,00       | 0,40         | 5,54             | 0,54         | 2,67             | 0,19         |
| 240   | 2,14      | 1,71         | 4,35       | 1,69         | 0,48       | 2,40         | 4,00             | 1,25         | 4,49             | 1,69         |
| 360   | 9,45      | 0,44         | 8,86       | 0,76         | 3,68       | 1,11         | 1,52             | 0,30         | 3,28             | 1,01         |
| 1320  | 0,11      | 0,11         | 0,46       | 0,46         | 1,58       | 1,04         | 1,15             | 0,58         | 5,02             | 1,65         |

## NMR study of sialidase activity

**Table S9.** Data for Figure 4: Quantification of sialidase activity of 2,3SiaT<sub>pPh</sub> and variants by <sup>1</sup>H NMR (500 MHz) *in situ* monitoring of Neu5Ac liberation from  $\alpha$ 2,3-SiaLac.<sup>[a]</sup>

|     | Native SiaT | A151D | L387A | S359T/S360T |
|-----|-------------|-------|-------|-------------|
| 18h | 10.40       | 0.48  | 0.29  | 0.27        |
| 20h | 11.72       | 0.50  | 0.32  | 0.38        |
| 22h | 13.13       | 0.55  | 0.33  | 0.40        |
| 24h | 13.23       | 0.60  | 0.34  | 0.46        |
| 42h | 19.16       | 0.83  | 0.48  | 0.71        |
| 48h | 20.45       | 0.92  | 0.65  | 0.66        |

[a] Conditions: 14.9 mM  $\alpha$ 2,3-SiaLac, 520  $\mu$ L Tris-buffered (20 mM) D<sub>2</sub>O, 10  $\mu$ g enzyme, 30°C, 48h.

## Control for CMP independent sialidase activity

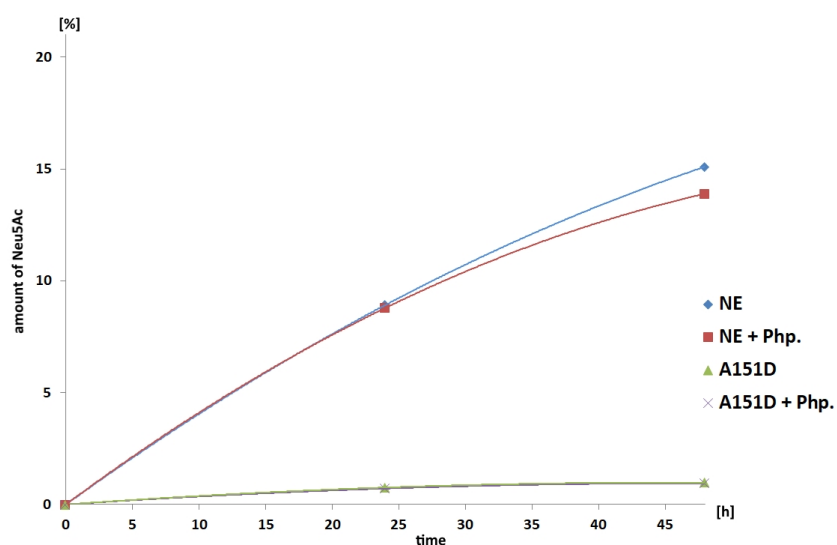

**Figure S7.** Control experiment for sialidase activity in the presence of alkaline phosphatase (Php) by *in situ*-NMR spectroscopy demonstrating hydrolytic Neu5Ac release from GM3 in the absence of CMP. Conditions: 14.9 mM  $\alpha$ 2,3-SiaLac, 520  $\mu$ L Tris-buffered (20 mM) D<sub>2</sub>O, 10  $\mu$ g enzyme, 30°C, 48h. Control: + 20 U alkaline phosphatase. NE = native enzyme.

### **General protocol for synthesis of fluorescence-labeled *neo*-sialoconjugates using native 2,3SiaT<sub>pph</sub>**

CTP (25.2 mg; 2 eq.) and the corresponding sialic acid (Neu5Ac **1** or analogs **2-6**; 1.5 eq.) were dissolved in 5 mL Tris-HCl buffer (50 mM, pH 8.6) containing 0.5 M NaCl, 0.1% Triton×100 and 20 mM MgCl<sub>2</sub>. Reaction was started by addition of 5 mg CSS from *N. meningitis* and inorganic pyrophosphatase (2 U). When CMP activation was completed, lactoside **7** (20 mg; 1 eq.), 0.5 mg recombinant 2,3SiaT<sub>pph</sub> and alkaline phosphatase (160 U) were added and the pH was readjusted. When the reaction was finished, 30 mL cold methanol (−20 °C) was added to stop the reaction. Protein precipitate was removed by filtration. The filtrate was passed over a plug of reverse-phase C<sub>18</sub>-silica and the product eluted with 20-50% gradient of aqueous methanol. The solution was concentrated to 10 mL and separated by Biogel P-2 (Bio-Rad, Germany) column chromatography (3 × 100 cm) using 5 mM Tris buffer (pH 8.5). The product fractions were collected and lyophilized for characterization.

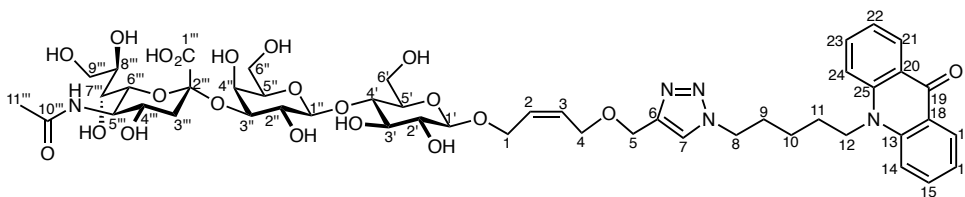

**$\alpha,2,3$ -Neu5Ac-Lac-Acr (8)** from 13.1 mg Neu5Ac; yield 23.7 mg pale yellow solid (84%).

$^1\text{H}$  NMR (500 MHz,  $\text{D}_2\text{O}$ )  $\delta$  = 7.87 (d,  $J$  = 8.1 Hz, 2H, 17-, 21-H), 7.82 (s, 1H, 7-H), 7.37 (t,  $J$  = 7.1 Hz, 2H, 15-, 23-H), 6.98 – 6.90 (m, 4H, 24-, 14-, 16-, 22-H), 5.79 – 5.56 (m, 2H, 2-, 3-H), 4.54 (s, 2H, 5-H), 4.52 (d,  $J$  = 8.1 Hz, 1H, 1''-H), 4.35 (d,  $J$  = 8.0 Hz, 1H, 1'-H), 4.32 – 4.22 (m, 3H, 1a-, 8-H), 4.22 – 4.16 (m, 1H, 1b-H), 4.16 – 4.11 (m, 1H), 4.04 – 3.98 (m, 3H, 3''-, 2-, 4-H), 3.96 – 3.85 (m, 5H, 4''-, 6'''-, 9'''a-, 6'a-, 5'''-H), 3.82 – 3.50 (m, 13H, 6'b-, 6''-, 8'''-, 7'''-, 9'''b-, 3'-, 4'''-, 4'-, 2''-, 8-, 5''-H), 3.42 (ddd,  $J$  = 9.6, 4.7, 2.5 Hz, 1H, 5'-H), 3.29 (dd,  $J$  = 9.1, 8.1 Hz, 1H, 2'-H), 2.81 (dd,  $J$  = 12.4, 4.6 Hz, 1H, 3'''a-H), 2.07 (s, 3H, 11'''-H), 1.84 (t,  $J$  = 12.1 Hz, 1H, 3'''b-H), 1.67 – 1.57 (m, 2H, 9-H), 1.19 – 0.99 (m, 4H, 11-, 10-H).

$^{13}\text{C}$  NMR (126 MHz,  $\text{D}_2\text{O}$ )  $\delta$  = 178.00 (C-19), 175.03 (C-10'''), 173.90 (C-1'''), 143.81 (C-6), 140.53 (C-13, -25), 134.49 (C-15, -23), 129.25 (C-2), 129.00 (C-3), 126.19 (C-17, -21), 124.59 (C-7), 121.58 (C-16, -22), 120.34 (C-18, -20), 114.92 (C-14, -24), 102.75 (C-1''), 101.10 (C-1'), 99.83 (C-2'''), 78.34 (C-4'), 75.55 (C-3''), 75.15 (C-5''), 74.76 (C-5'), 74.41 (C-3'), 72.93 (C-2'), 72.71 (C-8'''), 71.77 (C-6'''), 69.37 (C-2''), 68.34 (C-7'''), 68.14 (C-4'''), 67.50 (C-4''), 65.13 (C-4), 64.70 (C-1), 62.64 (C-9'''), 62.32 (C-5), 61.03 (C-6''), 60.04 (C-6'), 51.77 (C-5'''), 50.02 (C-8), 45.20 (C-12), 39.70 (C-3'''), 28.80 (C-9), 25.73 (C-11), 22.61 (C-10), 22.08 (C-11''').

HRMS ESI<sup>+</sup>:  $m/z$  calcd for  $[\text{C}_{48}\text{H}_{66}\text{N}_5\text{O}_{21}]^+$  = 1048.4245; found 1048.4255.

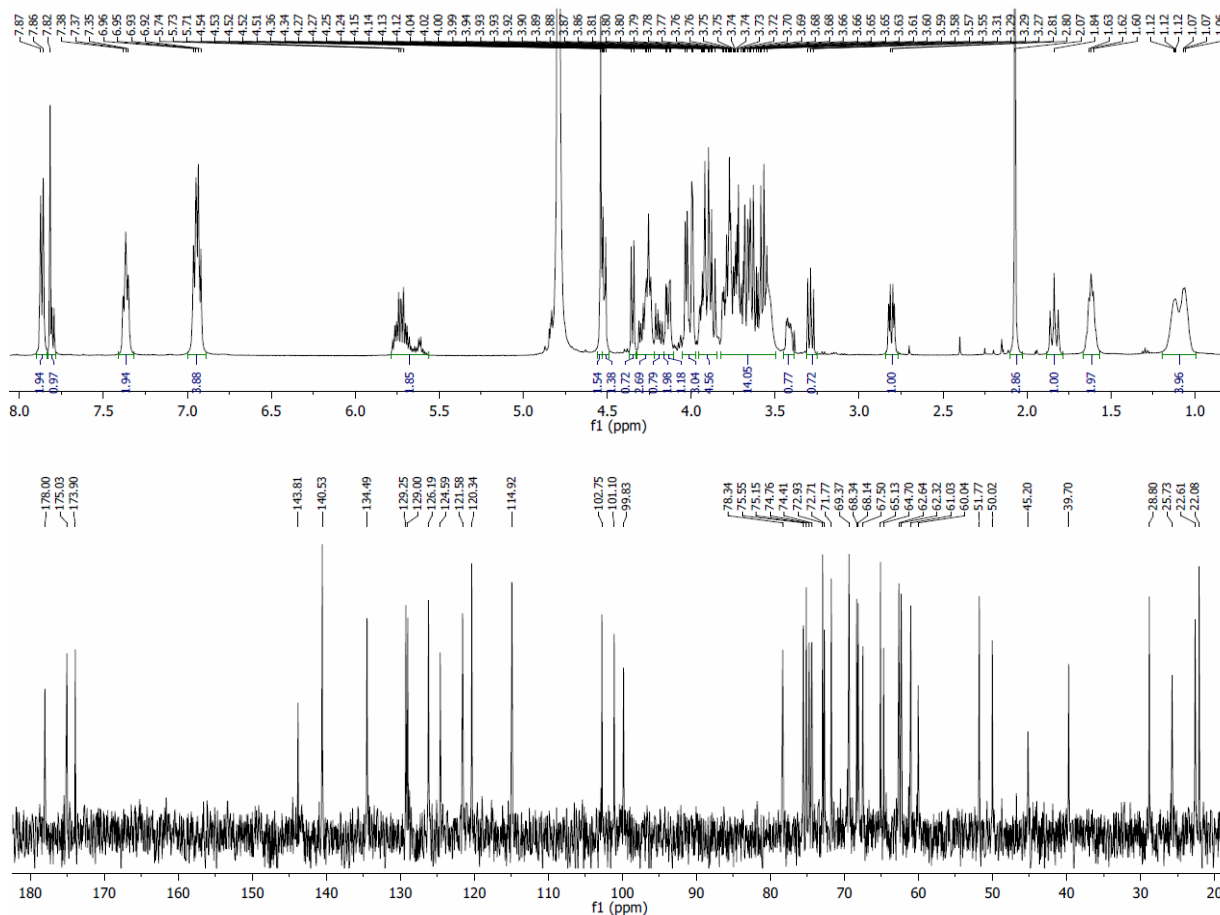



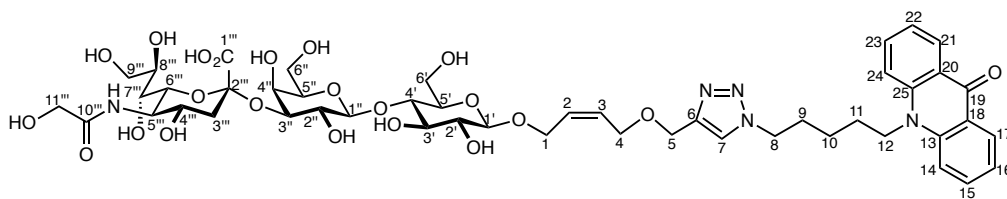

**$\alpha$ ,2,3-Neu5Gc-Lac-Acr (9)** from 13.7 mg Neu5Gc; yield 22.1 mg pale yellow solid (77%).

$^1\text{H}$  NMR (500 MHz,  $\text{D}_2\text{O}$ )  $\delta$  = 7.95 (dd,  $J$  = 8.1, 1.6 Hz, 2H, 17-, 21-H), 7.86 (s, 1H, 7-H), 7.46 (ddd,  $J$  = 8.7, 6.9, 1.6 Hz, 2H, 15-, 23-H), 7.10 – 6.96 (m, 4H, 24-, 14-, 16-, 22-H), 5.84 – 5.63 (m, 2H, 2-, 3-H), 4.59 (s, 2H, 5-H), 4.55 (d,  $J$  = 7.8 Hz, 1H, 1''-H), 4.38 (d,  $J$  = 8.0 Hz, 1H, 1'-H), 4.34 – 4.29 (m, 3H, 1a-, 8-H), 4.25 – 4.15 (m, 4H, 11'''-, 1b-, 3''-H), 4.07 – 3.79 (m, 12H, 6'a-, 5'''-, 6'b-, 6'''-, 8'''-, 9'''b-, 3'-, 4'''-, 4''-, 2''-H), 3.79 – 3.57 (m, 9H, 6''b-, 3''-, 9'''b-, 12-, 7'''-, 3'-, 4'-, 2''-H), 3.45 (ddd,  $J$  = 9.7, 4.9, 2.5 Hz, 1H, 5'-H), 3.32 (dd,  $J$  = 9.2, 8.0 Hz, 1H, 2'-H), 2.90 – 2.82 (m, 1H, 3'''a-H), 1.88 (td,  $J$  = 12.1, 3.5 Hz, 1H, 3'''b-H), 1.69 (p,  $J$  = 7.0 Hz, 2H, 9-H), 1.20 – 1.06 (m, 4H, 11-, 10-H).

$^{13}\text{C}$  NMR (126 MHz,  $\text{D}_2\text{O}$ )  $\delta$  = 178.17 (C-19), 175.82 (C-10'''), 173.95 (C-1'''), 143.87 (C-6), 140.65 (C-13, -25), 134.60 (C-15, -23), 129.27 (C-2), 129.05 (C-3), 126.25 (C-17, -21), 124.66 (C-7), 121.68 (C-16, -22), 120.41 (C-18, -20), 115.05 (C-14, -24), 102.80 (C-1''), 101.13 (C-1'), 99.89 (C-2'''), 78.42 (C-4'), 75.60 (C-3''), 75.19 (C-8'''), 74.80 (C-5'), 74.45 (C-5''), 72.74 (C-3'), 72.70 (C-2'), 71.86 (C-6'''), 69.41 (C-2''), 68.13 (C-7'''), 67.53 (C-4'''), 65.10 (C-4), 64.73 (C-1), 62.65 (C-9'''), 62.35 (C-5), 61.08 (C-6'', -11'''), 60.10 (C-6'), 51.51 (C-5'''), 50.09 (C-8), 45.24 (C-12), 39.81 (C-3'''), 28.81 (C-9), 25.79 (C-11), 22.66 (C-10).

HRMS ESI<sup>+</sup>:  $m/z$  calcd for  $[\text{C}_{48}\text{H}_{66}\text{N}_5\text{O}_{22}]^+$  = 1064.4194; found 1064.4206.

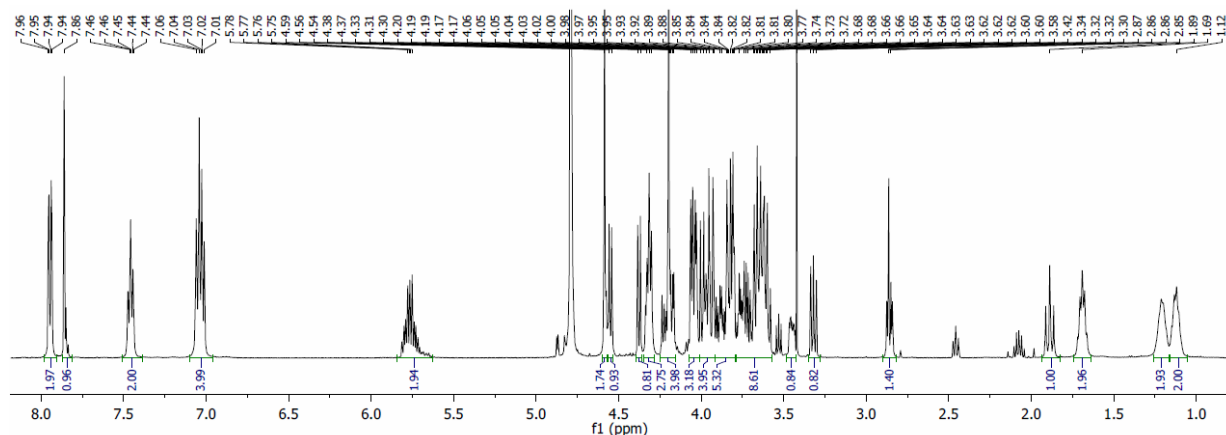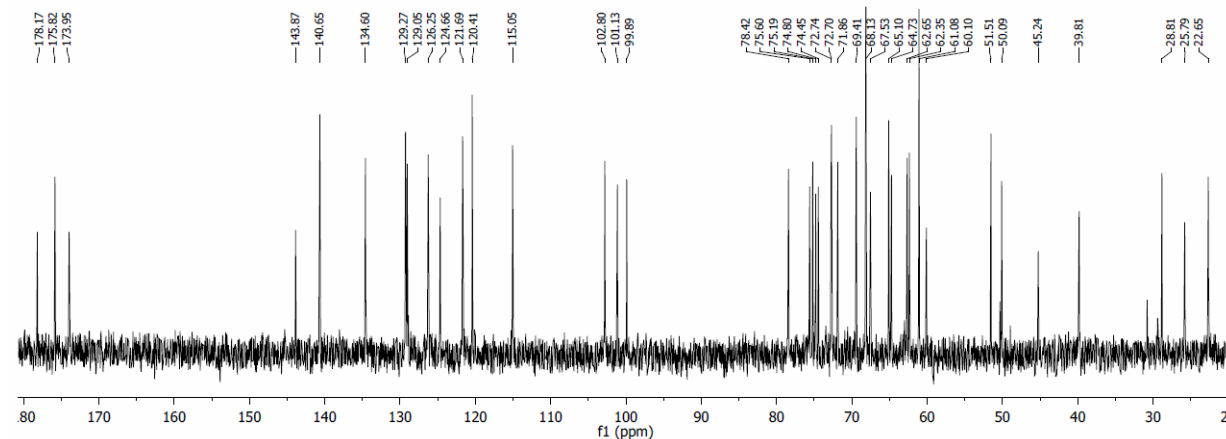

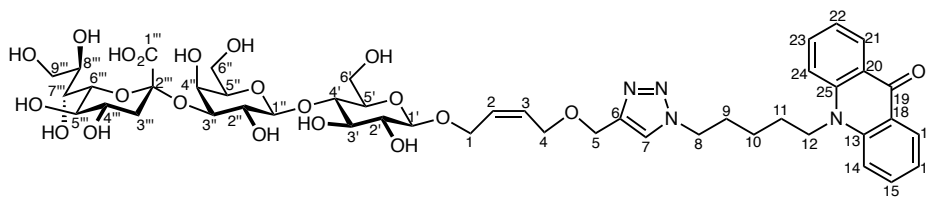

**$\alpha,2,3$ -KDN-Lac-Acr (10)** from 11.5 mg KDN; yield 23.4 mg pale yellow solid (86%).

$^1\text{H}$  NMR (500 MHz,  $\text{D}_2\text{O}$ )  $\delta$  = 7.92 (dd,  $J$  = 8.0, 1.7 Hz, 2H, 17-, 21H), 7.84 (s, 1H, 7-H), 7.45 – 7.35 (m, 2H, 15-, 23-H), 7.05 – 6.92 (m, 4H, 14-, 24-, 16-, 22-H), 5.81 – 5.62 (m, 2H, 2-, 3-H), 4.56 (s, 2H, 5-H), 4.55 – 4.52 (m, 1H, 1''-H), 4.38 (d,  $J$  = 8.0 Hz, 1H, 1'-H), 4.35 – 4.25 (m, 3H, 1a-, 8-H), 4.22 (dd,  $J$  = 12.6, 6.8 Hz, 1H, 1b-H), 4.17 – 4.13 (m, 1H, H3''), 4.07 – 4.01 (m, 3H), 4.00 – 3.90 (m, 4H), 3.85 – 3.73 (m, 5H), 3.72 – 3.54 (m, 8H, 12-, 9'''b-, 4'''-, 8'''-, 3'-, 2''-, 4'-H), 3.45 (ddd,  $J$  = 9.7, 4.8, 2.5 Hz, 1H, 5'-H), 3.42 (s, 1H), 3.32 (dd,  $J$  = 9.2, 8.0 Hz, 1H, 2'-H), 2.79 (dd,  $J$  = 12.5, 4.6 Hz, 1H, 3'''a-H), 1.83 (td,  $J$  = 12.0, 2.8 Hz, 1H, 3'''b-H), 1.69 – 1.60 (m, 2H, 9-H), 1.24 – 1.02 (m, 4H, 11-, 10-H).

$^{13}\text{C}$  NMR (126 MHz,  $\text{D}_2\text{O}$ )  $\delta$  = 178.05 (C-19), 174.11 (C-1'''), 143.88 (C-6), 140.61 (C-13, -25), 134.53 (C-15, -23), 129.29 (C-2), 129.04 (C-3), 126.25 (C-17, -21), 124.62 (C-7), 121.61 (C-16, -22), 120.43 (C-18, -20), 114.97 (C-14, -24), 102.82 (C-1''), 101.17 (C-1'), 99.87 (C-2'''), 78.43 (C-4'), 75.56 (C-3''), 75.20 (C-8'''), 74.79 (C-5'), 74.46 (C-5''), 73.99 (C-3'), 72.75 (C-2'), 72.14 (C-6'''), 70.34 (C-2''), 69.85 (C-7'''), 69.40 (C-4'''), 67.83 (C-5'''), 65.17 (C-4), 64.76 (C-1), 62.76 (C-9'''), 62.37 (C-5), 61.06 (C-6''), 60.11 (C-6'), 50.05 (C-8), 45.24 (C-12), 39.39 (C-3'''), 28.83 (C-9), 25.78 (C-11), 22.66 (C-10).

HRMS ESI<sup>+</sup>:  $m/z$  calcd for  $[\text{C}_{46}\text{H}_{63}\text{N}_4\text{O}_{21}]^+$  = 1007.3979; found 1007.3989.

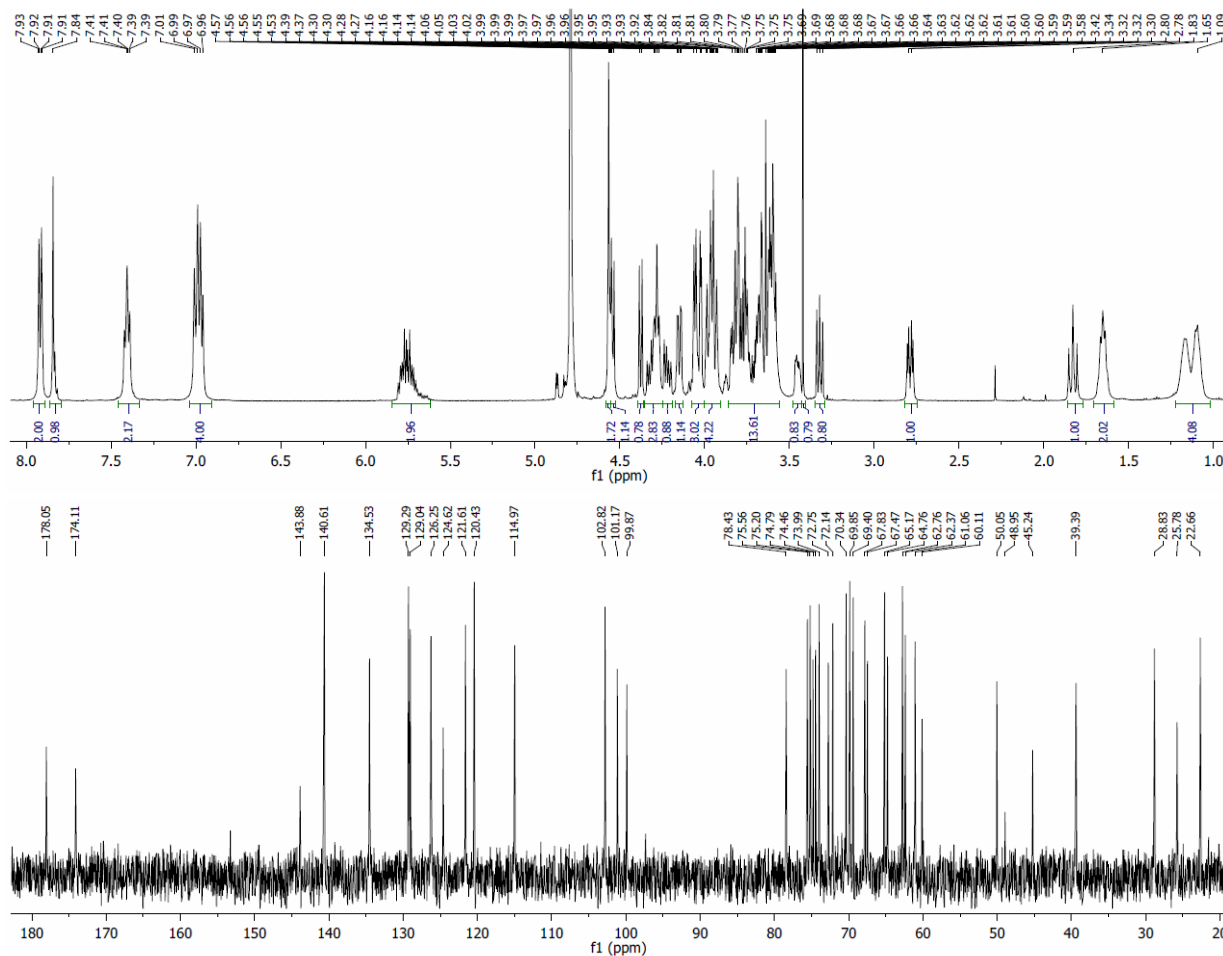



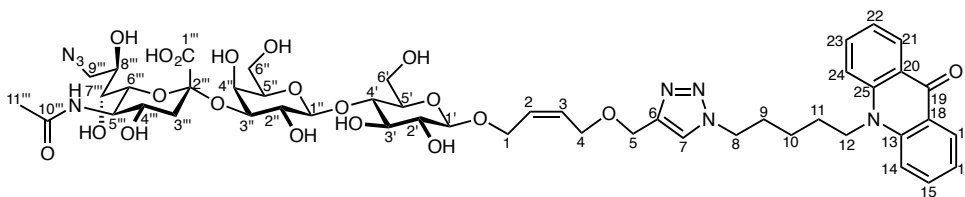

**$\alpha,2,3$ -Neu5Ac9N<sub>3</sub>-Lac-Acr (12)** from 14.1 mg Neu5Ac9N<sub>3</sub>; yield 23.7 mg pale yellow solid (82%).

<sup>1</sup>H NMR (500 MHz, D<sub>2</sub>O)  $\delta$  = 7.96 – 7.90 (m, 2H, 17-, 21-H), 7.84 (s, 1H, 7-H), 7.44 – 7.36 (m, 2H, 15-, 23-H), 7.04 – 6.93 (m, 4H, 24-, 14-, 16-, 22-H), 5.81 – 5.63 (m, 2H, 2-, 3-H), 4.56 (s, 2H, 5-H), 4.51 (d,  $J$  = 7.9 Hz, 1H, 1''-H), 4.38 (d,  $J$  = 7.9 Hz, 1H, 1'-H), 4.35 – 4.19 (m, 4H, 1'-, 1a-, 8-H), 4.17 – 4.11 (m, 1H, H-3'''), 4.10 – 3.99 (m, 5H, 6'''-, 4-, 6''a-, 8'''-H), 3.95 – 3.87 (m, 2H, 5'''-, 6'a-H), 3.84 – 3.56 (m, 15H), 3.50 (dd,  $J$  = 13.2, 6.6 Hz, 1H, 9'''b-H), 3.46 – 3.42 (m, 1H, 5'-H), 3.31 (dd,  $J$  = 9.1, 8.0 Hz, 1H, 2'-H), 2.84 (dd,  $J$  = 12.4, 4.6 Hz, 1H, 3'''a-H), 2.10 (s, 3H, 11'''-H), 1.85 (t,  $J$  = 12.1 Hz, 1H, 3'''b-H), 1.65 (t,  $J$  = 7.4 Hz, 2H, 9-H), 1.23 – 1.05 (m, 4H, 11-, 10-H).

<sup>13</sup>C NMR (126 MHz, D<sub>2</sub>O)  $\delta$  = 178.03 (C-19), 175.05 (C-10'''), 173.80 (C-1'''), 143.88 (C-6), 140.62 (C-13, -25), 134.51 (C-15, -23), 129.30 (C-2), 129.04 (C-3), 126.29 (C-17, -21), 124.59 (C-7), 121.59 (C-16, -22), 120.47 (C-18, -20), 114.95 (C-14, -24), 102.80 (C-1''), 101.12 (C-1'), 99.83 (C-2'''), 78.36 (C-4'), 75.75 (C-3''), 75.21 (C-8'''), 74.82 (C-5'), 74.45 (C-5''), 72.78 (C-3'), 70.44 (C-2'), 69.36 (C-6'''), 68.94 (C-2''), 68.30 (C-7'''), 67.46 (C-4'''), 65.17 (C-4), 64.69 (C-1), 62.38 (C-5), 61.04 (C-6'''), 60.16 (C-6'), 53.24 (C-9'''), 51.82 (C-5'''), 50.03 (C-8), 45.25 (C-12), 39.92 (C-3'''), 28.86 (C-9), 25.79 (C-11), 22.68 (C-10), 22.14 (C-11''').

HRMS ESI<sup>+</sup>:  $m/z$  calcd for [C<sub>48</sub>H<sub>65</sub>N<sub>8</sub>O<sub>20</sub>]<sup>+</sup> = 1073.4310; found 1073.4321.

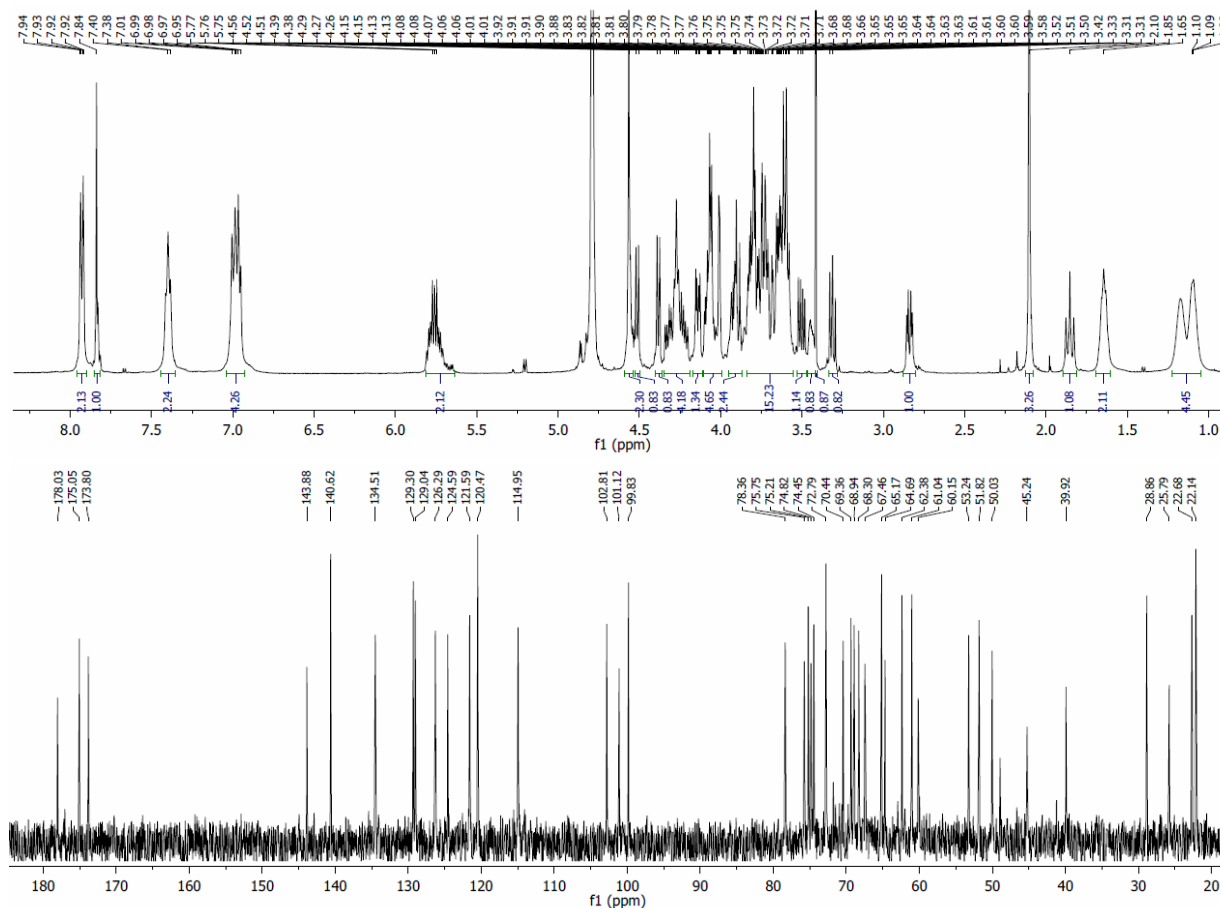

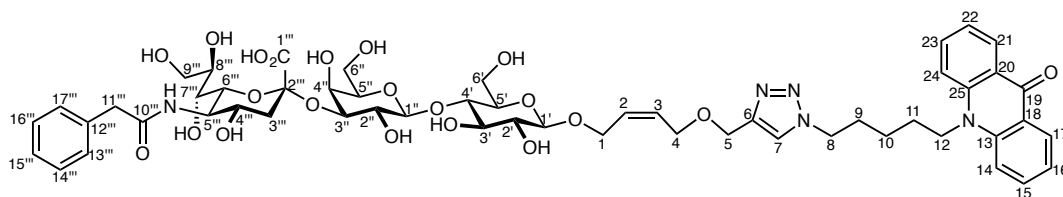

**$\alpha$ 2,3-Neu5NPhAc-Lac-Acr (13)** from 16.1 mg Neu5NPhAc; yield 14.5 mg pale yellow solid (48%).

$^1\text{H NMR}$  (500 MHz,  $\text{D}_2\text{O}$ )  $\delta$  = 7.98 (dd,  $J$  = 7.9, 1.7 Hz, 2H, 17-, 21-H), 7.84 (s, 1H, 7-H), 7.45 (dt,  $J$  = 10.7, 8.3 Hz, 2H, 15-, 23-H), 7.42 – 7.28 (m, 5H, Har), 7.11 – 6.99 (m, 4H, 24-, 14-, 16-, 22-H), 5.82 – 5.60 (m, 2H, 2-, 3-H), 4.57 (s, 2H, 5-H), 4.53 (d,  $J$  = 7.8 Hz, 1H, 1'-H), 4.37 (d,  $J$  = 7.9 Hz, 1H, 1'-H), 4.33 – 4.25 (m, 3H, 1a-, 8-H), 4.22 (dd,  $J$  = 12.6, 6.5 Hz, 1H, 1b-H), 4.18 – 4.12 (m, 1H, 3''-H), 4.07 – 3.99 (m, 3H), 3.94 – 3.55 (m, 20H), 3.45 – 3.40 (m, 2H, 7'''-, 5'-H), 3.31 (dd,  $J$  = 9.2, 8.0 Hz, 1H, 2'-H), 2.88 – 2.81 (m, 1H, 3'''a-H), 1.85 (td,  $J$  = 11.8, 3.7 Hz, 1H, 3'''b-H), 1.68 (p,  $J$  = 6.3 Hz, 2H, 9-H), 1.29 – 1.06 (m, 4H, 11-, 10-H).

$^{13}\text{C NMR}$  (126 MHz,  $\text{D}_2\text{O}$ )  $\delta$  = 178.21 (C-19), 175.60 (C-10'''), 173.88 (C-1'''), 143.85 (C-6), 140.71 (C-13, -25), 135.04 (C-15, -23), 134.61 (C-12'''), 129.34 (C-14''''), 129.09 (C-2), 129.01 (C-3), 128.91 (C-13''', -15'''), 127.30 (C-12''', -16'''), 126.29 (C-17, -21), 124.64 (C-7), 121.69 (C-16, -22), 120.48 (C-18, -20), 115.08 (C-14, -24), 102.82 (C-1''), 100.99 (C-1'), 99.81 (C-2'''), 78.35 (C-4'), 75.62 (C-3'''), 75.21 (C-8'''), 74.79 (C-5'), 74.44 (C-5''), 72.99 (C-3'), 72.74 (C-2'), 71.85 (C-6'''), 69.37 (C-2''), 68.32 (C-7'''), 67.53 (C-4'''), 65.08 (C-4), 64.60 (C-1), 62.80 (C-9'''), 62.35 (C-5), 61.05 (C-6''), 60.03 (C-6'), 59.84 (C-12), 51.92 (C-5'''), 50.08 (C-8), 42.60 (C-11'''), 39.95 (C-3'''), 28.84 (C-9), 25.82 (C-11), 22.69 (C-10).

HRMS ESI<sup>+</sup>:  $m/z$  calcd for  $[\text{C}_{54}\text{H}_{70}\text{N}_5\text{O}_{21}]^+$  = 1124.4558; found 1124.4572.

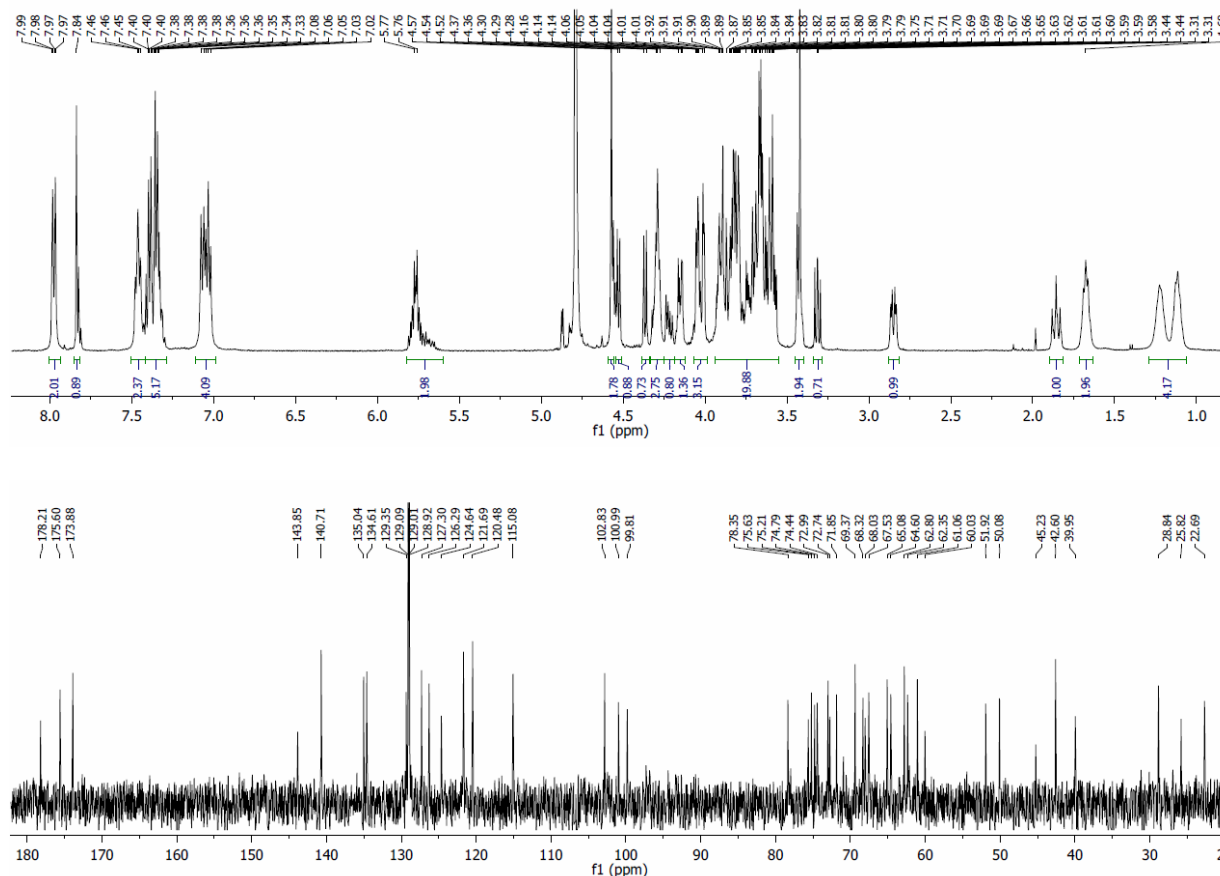

## Synthesis of $\alpha$ 2,3-SiaLac (GM3 trisaccharide, **14**) by native 2,3SiaT<sub>p<sub>pp</sub></sub> and engineered 2,3SiaT<sub>p<sub>pp</sub></sub> (A151D)

Neu5Ac (50 mg, 1 eq.) and CTP (117.2 mg, 1.5 eq.) were dissolved in 12 mL Tris-HCl buffer (50 mM, pH 8.5) containing 20 mM MgCl<sub>2</sub>. After addition of inorganic pyrophosphatase (10 U) the reaction mixture was re-adjusted to pH 8.5 and started by adding 10 mg CSS, while keeping the pH constant by autotitration. After 2 h at 37 °C TLC analysis indicated the disappearance of Neu5Ac, then lactose (174.7 mg, 3 eq.), native 2,3SiaT<sub>p<sub>pp</sub></sub> or 2,3SiaT<sub>p<sub>pp</sub></sub> (A151D) (0.5 mg) and alkaline phosphatase (319 U) were added and incubation continued overnight. When conversion was completed, an equivalent volume of cold methanol (−20 °C) was added to stop the reaction. Protein precipitate was removed by centrifugation, methanol evaporated under reduced pressure, and the remaining solution directly purified over Biogel P-2 (Bio-Rad, Germany; 3 × 100 cm column). The product fractions were collected and lyophilized for NMR analysis. Product **14** was obtained as colorless solid (88.2 mg, 86% for native 2,3SiaT<sub>p<sub>pp</sub></sub> / 93.4 mg, 91% for 2,3SiaT<sub>p<sub>pp</sub></sub> (A151D)).

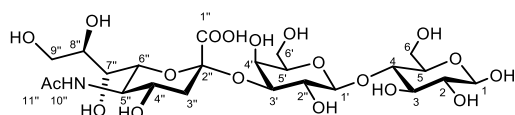

<sup>1</sup>H NMR (500 MHz, D<sub>2</sub>O)  $\delta$  = 5.29 (d,  $J$  = 3.7 Hz, 0.4H, 1 $\alpha$ -H), 4.73 (d,  $J$  = 8.1 Hz, 0.6H, 1 $\beta$ -H), 4.59 (d,  $J$  = 7.9 Hz, 1H, 1' $\beta$ -H), 4.18 (ddd,  $J$  = 9.9, 1.9, 2.9 Hz, 1H, 3'-H), 4.06-3.99 (m, 1.8H, 4'-, 6 $\alpha$ -H), 3.98-3.85 (m, 5H, 6''-, 5''-, 5-, 6'-H), 3.82-3.74 (m, 4H, 6 $\beta$ -, 5'-, 4-H) 3.74-3.68 (m, 4H, 4''-, 3-, 9''-H), 3.68-3.65 (m, 2H, 7''-, 8''-H), 3.64-3.61 (m, 1H, 2'-H), 3.35 (dd,  $J$  = 8.5 Hz, 1H, 2-H), 2.82 (dd,  $J$  = 12.4, 4.6 Hz, 1H, 3''-H), 2.10 (s, 3H, 11''-H), 1.86 (dd,  $J$  = 12.4, 12.1 Hz, 1H, 3'''-H).

<sup>13</sup>C NMR (126 MHz, D<sub>2</sub>O)  $\delta$  = 175.08 (C-1''), 173.90 (C-10''), 102.71 (C-1'), 99.89 (C-2''), 95.83 (C-1 $\beta$ ), 91.88 (C-1 $\alpha$ ), 78.46 (C-4 $\alpha$ ), 78.32 (C-4 $\beta$ ), 75.56 (C-3'), 75.21 (C-5'), 74.85 (C-2 $\alpha$ ), 74.39 (C-2 $\beta$ ), 73.89 (C-4''), 72.94 (C-3), 71.83 (C-6''), 71.44 (C-5 $\alpha$ ), 71.23 (C-5 $\beta$ ), 69.43 (C-2'), 68.37 (C-8''), 68.19 (C-7''), 67.57 (C-4'), 62.68 (C-9''), 61.08 (C-6'), 60.18 (C-6 $\alpha$ ), 59.48 (C-6 $\beta$ ), 51.77 (C-5''), 39.70 (C-3''), 22.14 (C-11'').

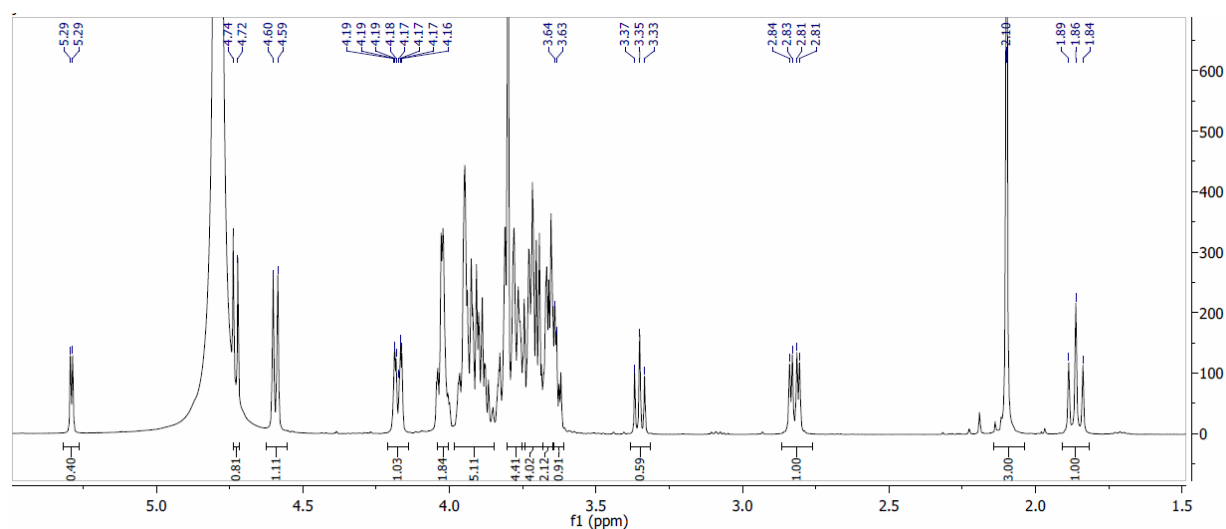

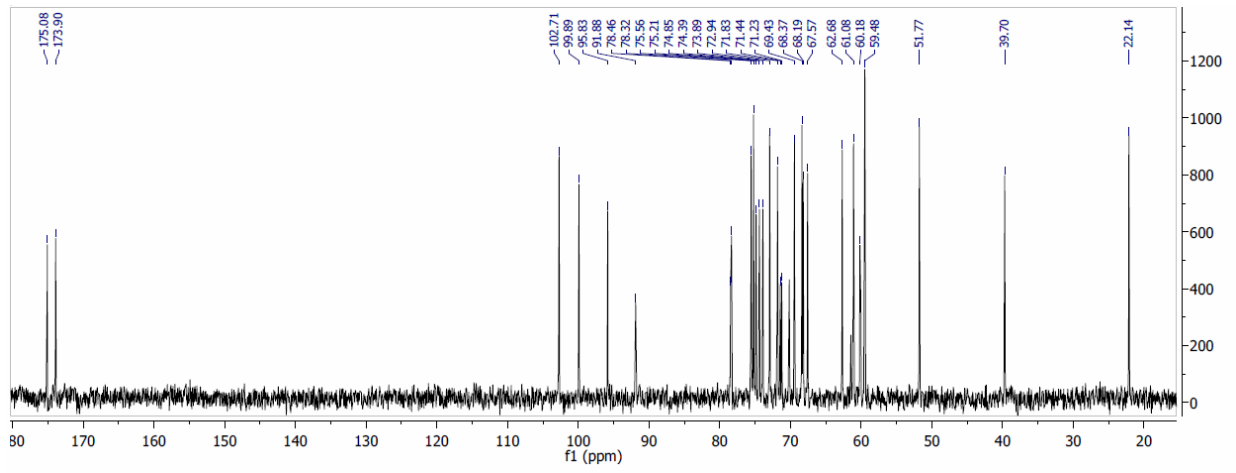

## Exemplary kinetic profiles for native enzyme (NE) and best variants

Enzymatic assays were performed as described. Experimental data were fitted to the Michaelis-Menten equation by nonlinear regression using Origin software (v9.1G, OriginLab) to derive apparent kinetic parameters.

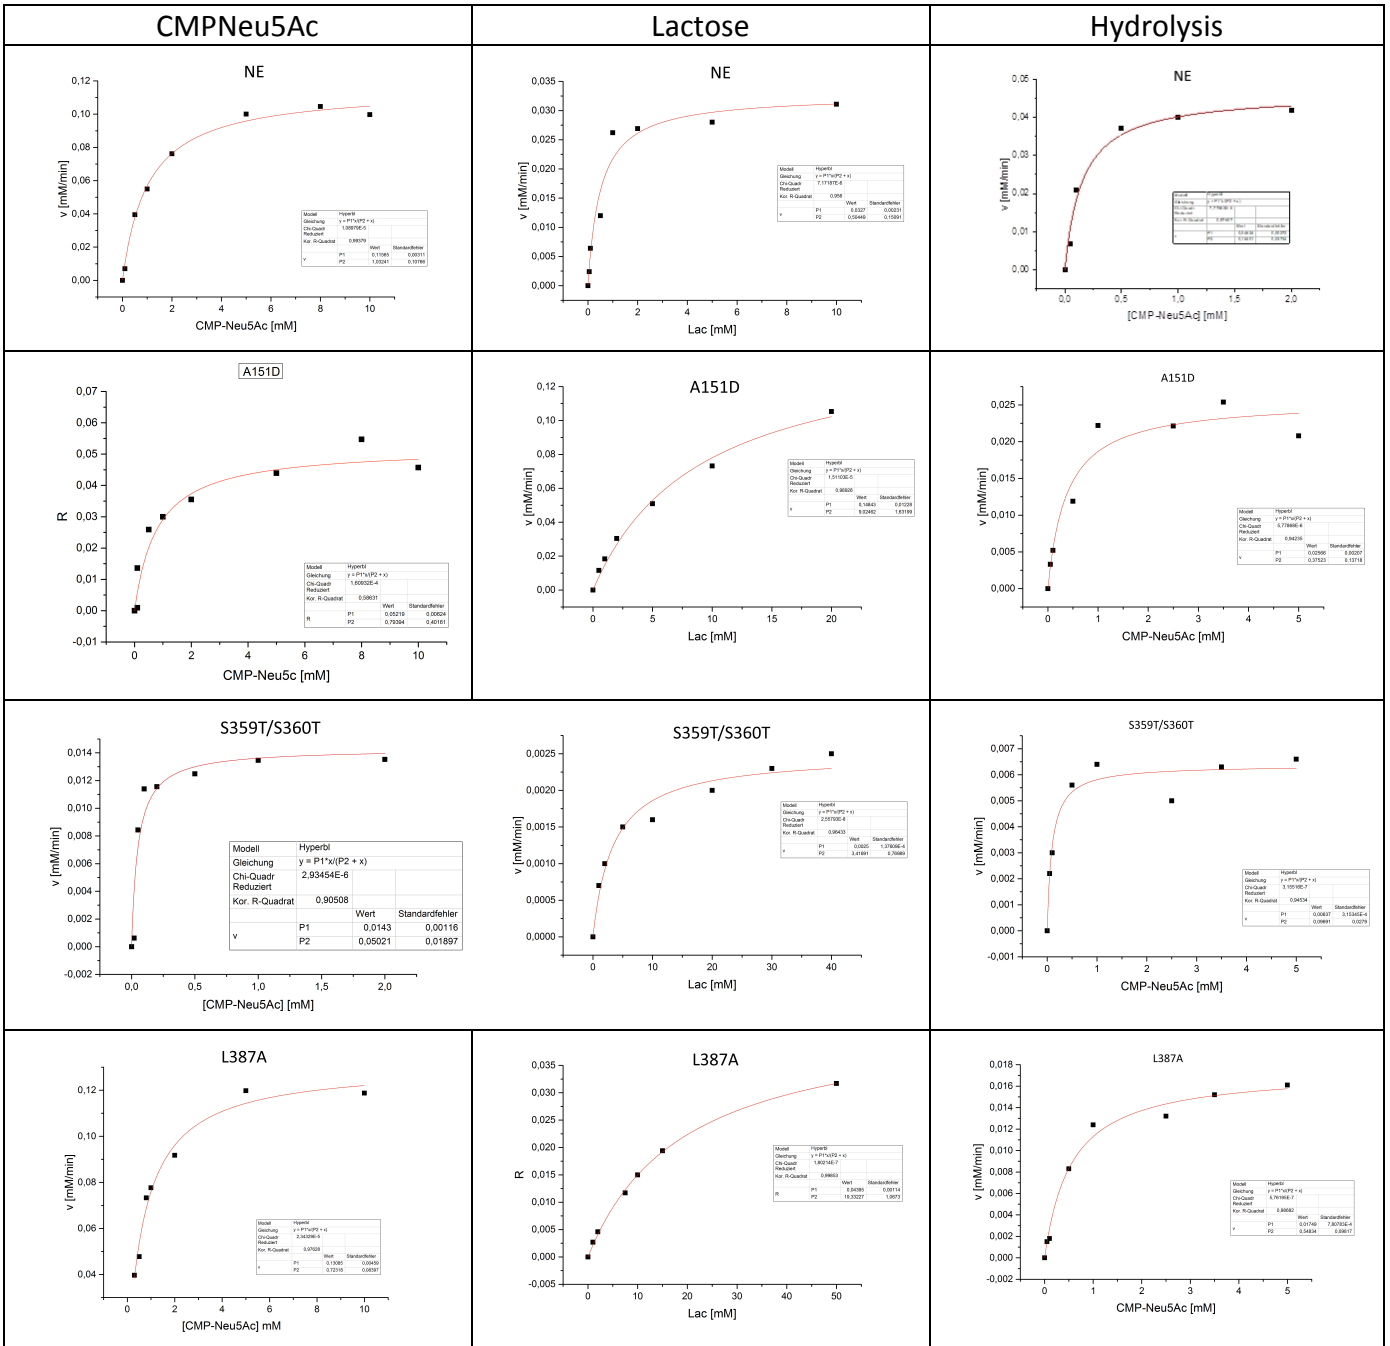



## Quality control of second-generation combination library by sequencing

Because positions 148, 150 and 151 are too close to each other to assure sufficient homogenous primer binding, positions 148-151 were first deleted with adjacent primers. Into the resulting template the desired mutated sequence was introduced by using appropriate overhang primers. The PCR product resulting from the first rounds contained the newly introduced sequence, which was used as template for further amplification cycles. The resulting plasmid mixes were sequenced to assure successful mutagenesis. For ambiguous sequence data single clones were sequenced to assure a positive result. All combinations were found:

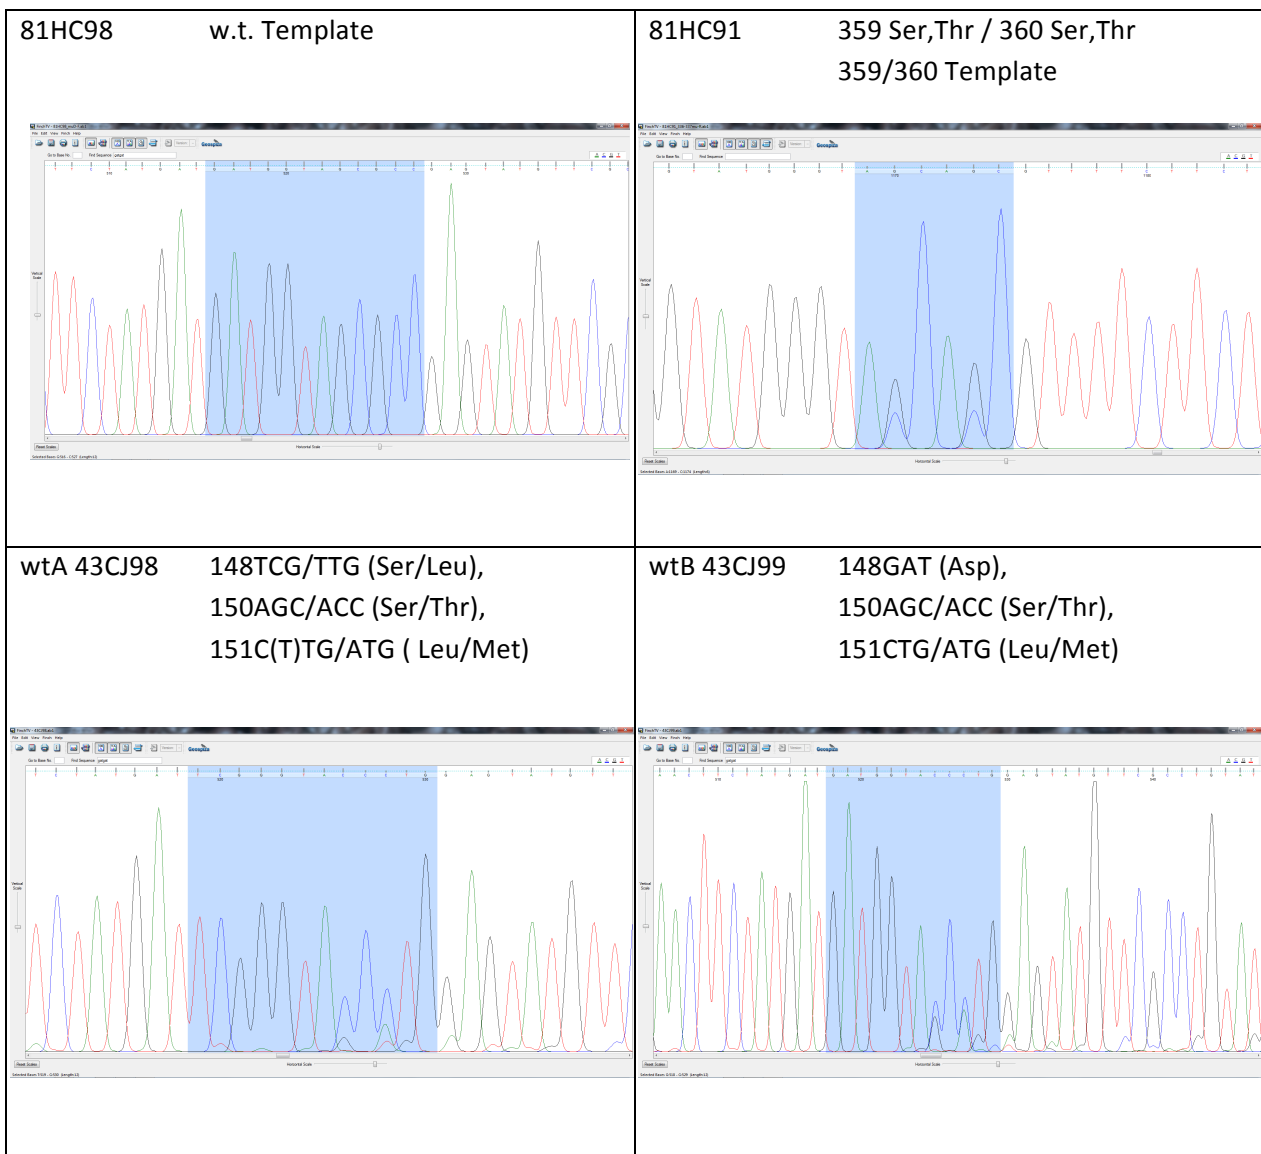

wtC 35GG96 148TCG/TTG (Ser/Leu),  
150AGC/ACC (Ser/Thr),  
151GCC (Ala)

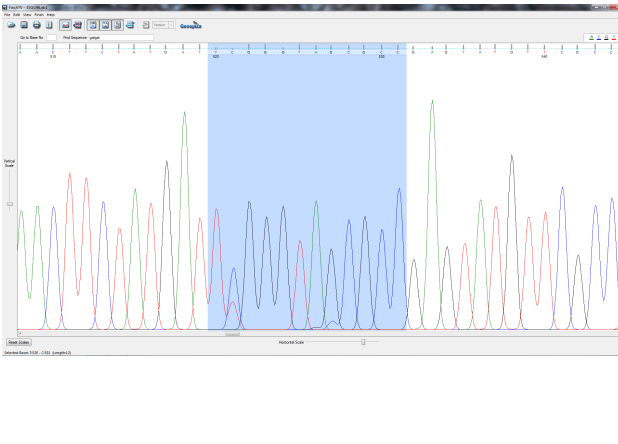

wtD 35GG97 148GAT (Asp),  
150ACC/AGC (Ser/Thr),  
151GCC (Ala)

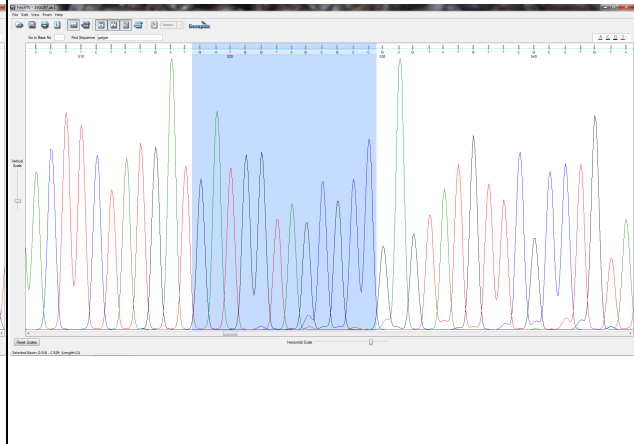

**336/337 muA single clones**

muA single clone 35GH06  
148 TCG (Ser), 150 AGC (Ser), 151, ATG (Met)

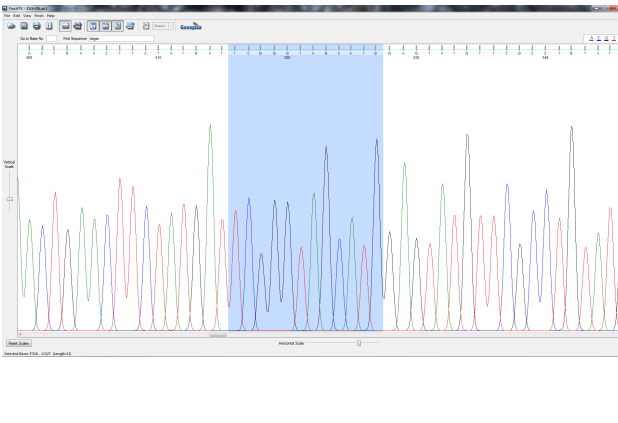

muA single clone 35GH07  
148 TCG (Ser), 150 AGC (Ser), 151 ATG (Met)

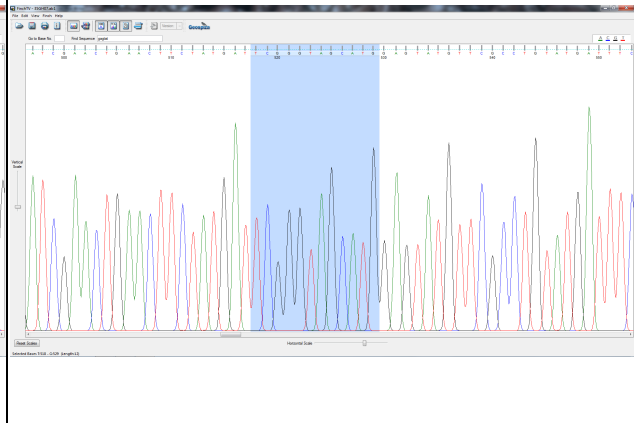

muA single clone 35GH08  
148 TCG (Ser), 150 ACC (Thr), 151 CTG (Leu)

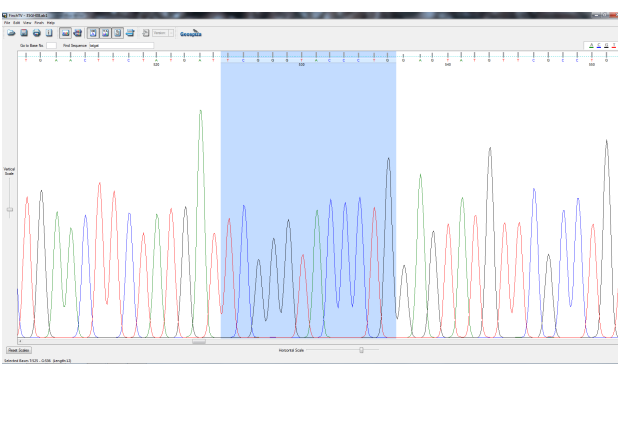

muB 35GG99  
148 GAT (Asp), 150 AGC/ACC (Ser/Thr),  
151 CTG/ATG (Leu/Met)

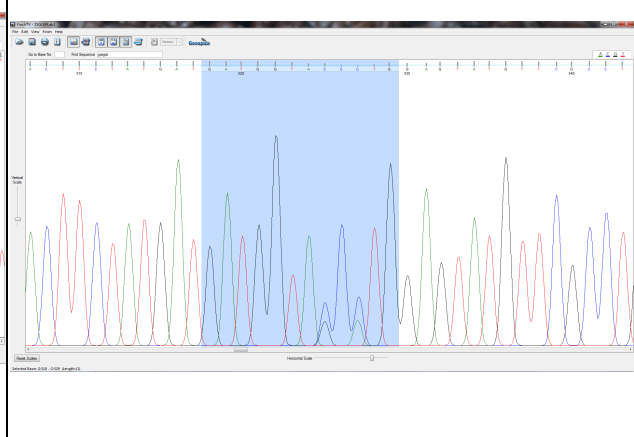

muC 43DA00  
 148 TCG/TTG (Ser/Leu), 150 AGC/ACC (Ser/Thr),  
 151 GCC (Ala)

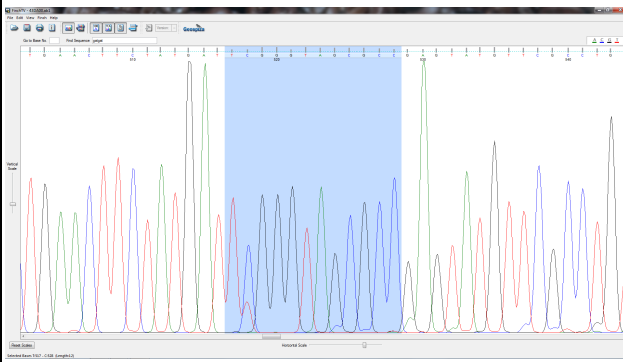

muC 35GH09  
 148Ser, 150Ser, 151Ala

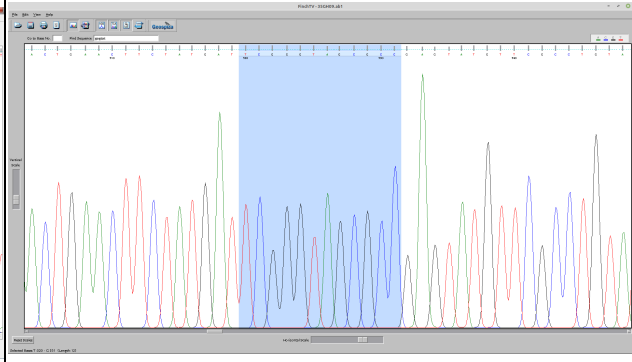

muC 35GH10  
 148 Ser, 150 Ser, 151 Ala

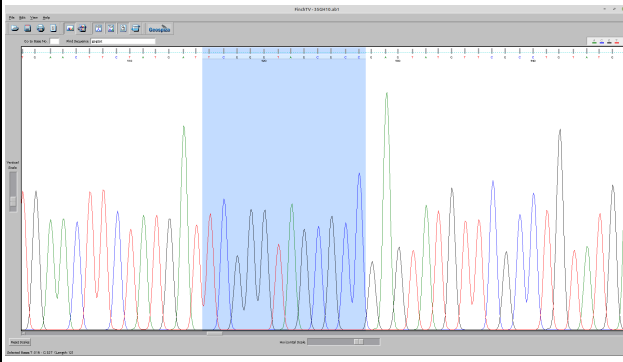

muC 35GH11  
 148 Leu, 150 Ser, 151Ala

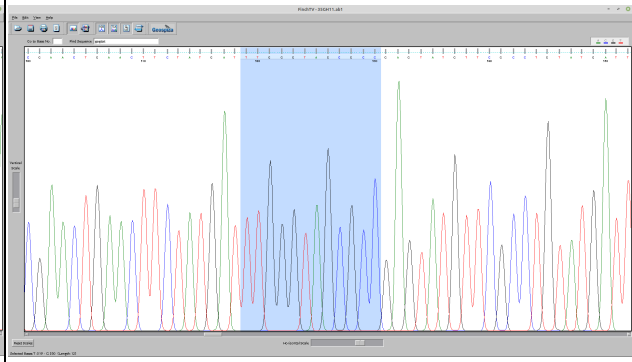

muD 43DA01  
 148 GAT (Asp), 150 AGC/ACC (Ser/Thr), 151 GCC  
 (Ala)

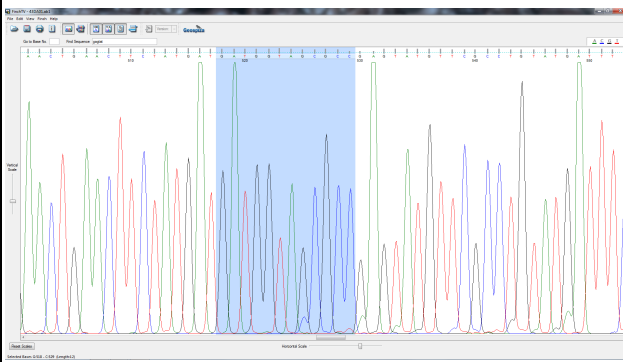

muD single clone 35GH12  
 148 GAT (Asp), 150 ACC (Thr), 151 GCC (Ala)

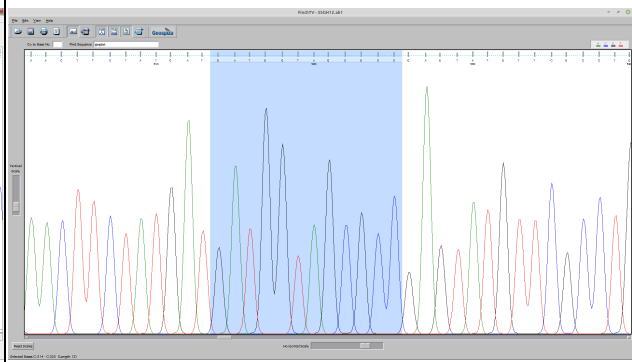

muD single clone 35GH13  
148 GAT (Asp), 150 AGC (Ser), 151 GCC (Ala)

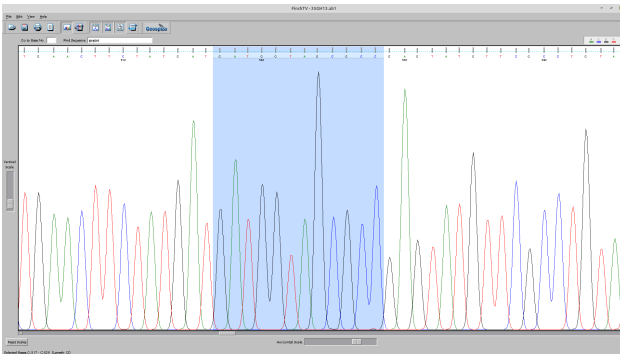

muD single clone 35GH14  
148 Asp, 150 Thr, 151 Ala

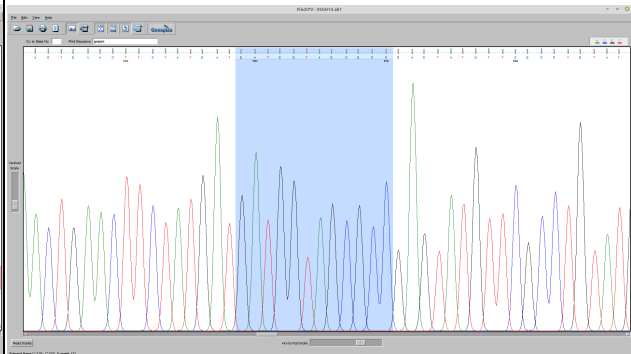

35GH46 muD single clone  
148 Asp, 150 Thr, 151 Ala

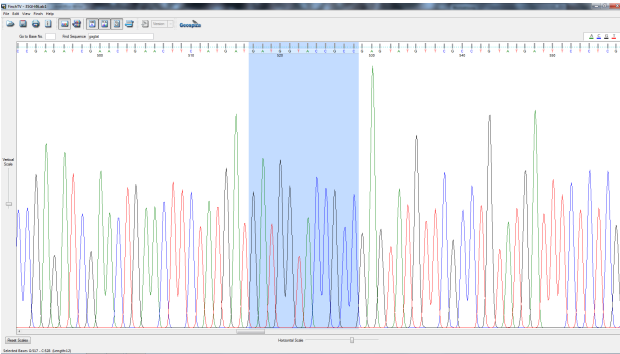

muD single clone 35GH47  
148 GAT (Asp), 150 AGC (Ser), 151 GCC (Ala)

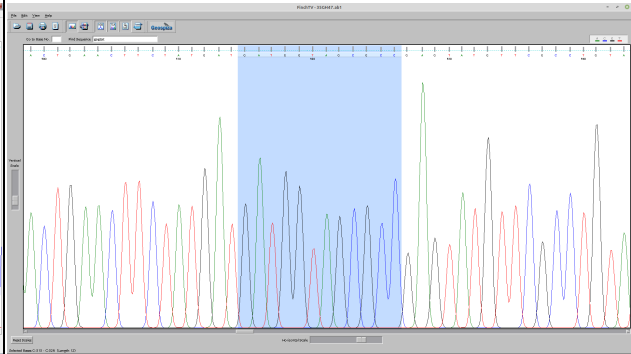

Supplement: CHEM-26-11614-s001.pdf [file CHEM-26-11614-s001.pdf]
